# Supplementary material for: Qualitätssicherung in der Notfallpflege
Source: Springer Nature journal article supplement (doi:10.1007/s41906-021-1010-1), 2021-03-17
Supplement: MOESM1 [file 18978040]

## Literatur

### zum Beitrag „Qualitätssicherung in der Notfallpflege“ von Maren Machner

*PflegeZeitschrift* (74) 4/2021, S. 10-13

- de Vries, E. N., Ramrattan, M. A., Smorenburg, S. M., Gouma, D. J., & Boermeester, M. A. (2008). The incidence and nature of in-hospital adverse events: A systematic review. *Quality and Safety in Health Care*, 17(3), 216–223.  
<https://doi.org/10.1136/qshc.2007.023622>
- Deutsche Gesellschaft für Interdisziplinäre Notfall- und Akutmedizin (DGINA). (2017). Definition Notfallpflege. [https://www.dgina.de/news/definition-notfallpflege\\_51](https://www.dgina.de/news/definition-notfallpflege_51)
- Deutsche Krankenhausgesellschaft. (2019). DKG-Empfehlung für die Weiterbildung Notfallpflege vom 18. Juni 2019.  
[https://www.dkgev.de/fileadmin/default/Mediapool/2\\_Themen/2.5.\\_Personal\\_und\\_Weiterbildung/2.5.11.\\_Aus-\\_und\\_Weiterbildung\\_von\\_Pflegeberufen/DKG-Empfehlung\\_fuer\\_die\\_Weiterbildung\\_Notfallpflege/DKG-Empfehlung\\_Weiterbildung\\_Notfallpflege.pdf](https://www.dkgev.de/fileadmin/default/Mediapool/2_Themen/2.5._Personal_und_Weiterbildung/2.5.11._Aus-_und_Weiterbildung_von_Pflegeberufen/DKG-Empfehlung_fuer_die_Weiterbildung_Notfallpflege/DKG-Empfehlung_Weiterbildung_Notfallpflege.pdf)
- Eisenmann, D., Stroben, F., Gerken, J., Exadaktylos, A., Machner, M., & Hautz, W. (2018). Interprofessional Emergency Training Leads to Changes in the Workplace. *Western Journal of Emergency Medicine*, 185–192.  
<https://doi.org/10.5811/westjem.2017.11.35275>
- Engelen-Kefer, U., Göppert, T. A., Hannemann, V., Hoßfeld, R., & Igl, G. (2017). Pflegeberufe der Zukunft: Akademisierung, Qualifizierung und Kompetenzentwicklung (U. Böttig, M. Frommelt, M. Roes, R. Schmidt, & G. Thiele, Eds.). medhochzwei.
- Euteneier, A. (Ed.). (2015). *Handbuch klinisches Risikomanagement: Grundlagen, Konzepte, Lösungen - medizinisch, ökonomisch, juristisch*. Springer.
- Hautz, S. C., Schuler, L., Kämmer, J. E., Schaubert, S. K., Ricklin, M. E., Sauter, T. C., Maier, V., Birrenbach, T., Exadaktylos, A., & Hautz, W. E. (2016). Factors predicting a change in diagnosis in patients hospitalised through the emergency room: A prospective observational study. *BMJ Open*, 6(5), e011585.  
<https://doi.org/10.1136/bmjopen-2016-011585>
- Lehmann, Y., Schaepe, C., Wulff, I., & Ewers, M. (2019). Pflege in anderen Ländern: Vom Ausland lernen? (1. Auflage). medhochzwei.
- Machner, M., Möckel, M., Liehr, B., Lindner, T., Göpel, M., Leifert, A., Bieberstein, S., Wedler, K., & Leidel, B. A. (2017). Entwicklung eines Curriculums für Notfallpflege an der Charité: Qualifikation gleich Qualität. *Notfall + Rettungsmedizin*, 20(6), 522–536.  
<https://doi.org/10.1007/s10049-016-0255-5>
- Machner, M., Walk, R., Möckel, M., Buchmann, M., & Schuster, S. (2020). Der Beschluss des Gemeinsamen Bundesausschusses zur gestuften Notfallversorgung und seine Auswirkung auf die Weiterbildung Notfallpflege: Eine deutschlandweite Querschnittserhebung. *Medizinische Klinik - Intensivmedizin und Notfallmedizin*.  
<https://doi.org/10.1007/s00063-019-00645-3>
- Notz, K. (2019). Anforderungen an die Qualifikation von Notaufnahmen- Personal—Pflegerisches und nicht-pflegerisches Personal. In *Notfallversorgung und Pflege in der Notaufnahme: Praxisbuch für die multiprofessionelle Zusammenarbeit* / Dubb, Kaltwasser, Pühringer, Schmid (Hrsg.). (2., erweiterte und überarbeitete Auflage, pp. 293–300). Verlag W. Kohlhammer. [https://primo.fu-berlin.de/FUB\\_ALMA\\_DS211012225200002883](https://primo.fu-berlin.de/FUB_ALMA_DS211012225200002883)
- Reeves, S. (2016). Ideas for the development of the interprofessional education and practice field: An update. *Journal of Interprofessional Care*, 30(4), 405–407.  
<https://doi.org/10.1080/13561820.2016.1197735>

- Riessen, R., Gries, A., Seekamp, A., Dodt, C., & Busch, H.-J. (2015). Positionspapier für eine Reform der medizinischen Notfallversorgung in deutschen Notaufnahmen. *Notfall + Rettungsmedizin*, 18(3), 174–185. <https://doi.org/10.1007/s10049-015-0013-0>
- Wedler, K., Machner, M., Mersmann, J., Schuster, S., Pozniak, A., Jahn, P., & Walcher, F. (2016). Entwicklungen und Perspektiven der Notfallpflege in Deutschland. *Notfall + Rettungsmedizin*, 19(7), 540–547. <https://doi.org/10.1007/s10049-016-0212-3>
- Wedler, K., Mersmann, J., Schuster, S., Stadelmeyer, U., Stork, G., Schwarz, C., Machner, M., Krebs, A., Petri, B., Fuchs, A., Scharf, J., Friesdorf, M., Swistun, H., Glien, P., Weiß, C., Dietz-Wittstock, M., Dormann, P., Schilling, T., & Walcher, F. (2018). Positionspapier zur Stärkung und Weiterentwicklung der Notfallpflege in deutschen Notaufnahmen. *Notfall + Rettungsmedizin*, 21(4), 308–313. <https://doi.org/10.1007/s10049-017-0333-3>
