# Supplementary material for: Qualitätssicherung in der Notfallpflege
Source: Springer Nature journal article supplement (doi:10.1007/s41906-021-1010-1), 2021-03-17

## Abbildung zum Beitrag „Qualitätssicherung in der Notfallpflege“ von Mareen Machner

PflegeZeitschrift (74) 4/2021, S. 10-13

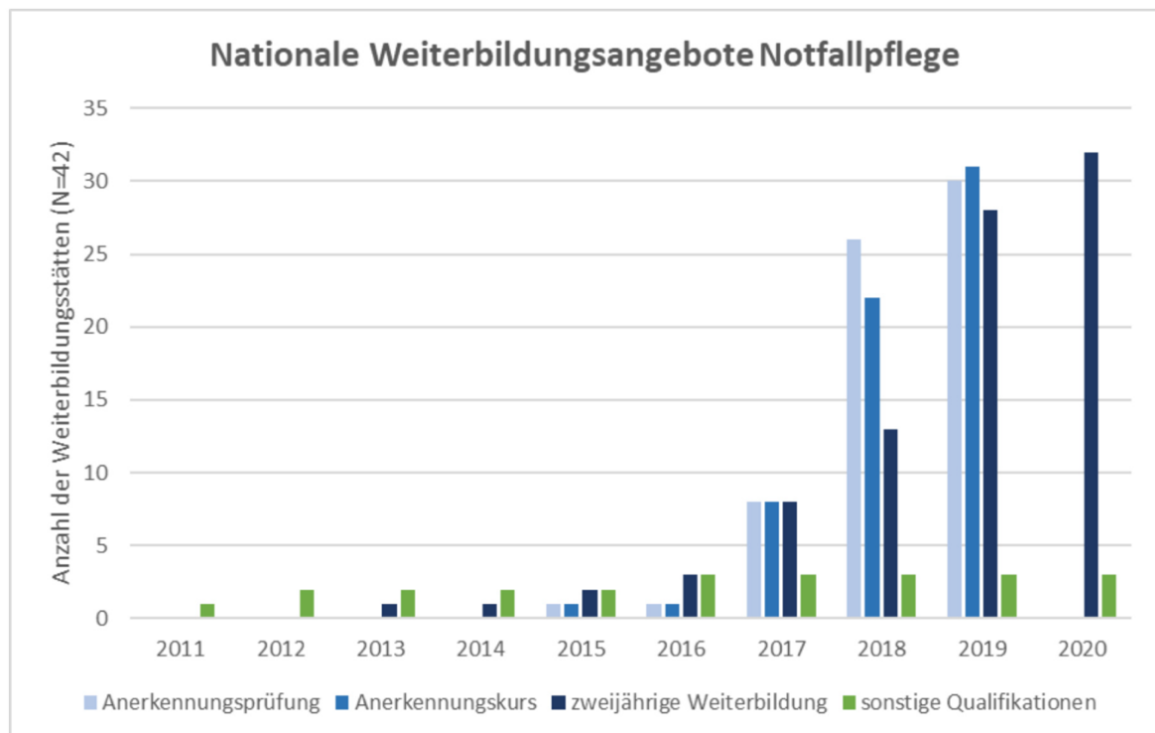

Supplement: MOESM2 [file 18978040]
